# Supplementary material for: A new hydrazone-linked covalent organic framework for Fe(iii) detection by fluorescence and QCM technologies
Source: Royal Society of Chemistry journal article supplement (doi:10.1039/d1ce00212k), 2021-01-01
Supplement: d1ce00212k1.pdf [file d1ce00212k1.pdf]

## A new hydrazone-linked covalent organic framework for Fe(III) detection by fluorescence and QCM technologies

Dian-Mei Li, Shu-Yuan Zhang, Jia-Yi Wan, Wen-Qian Zhang, Xi-Hao Tang\*, Sheng-Run Zheng, Jun Fan, Song-Liang Cai\*, and Wei-Guang Zhang\*

*School of Chemistry, South China Normal University, Guangzhou, 510006, P. R. China. E-mail: songliang@m.scnu.edu.cn; wgzhang@scnu.edu.cn; 20200243@m.scnu.edu.cn*

*Fax: +86-20-39347768*

### Supporting Information

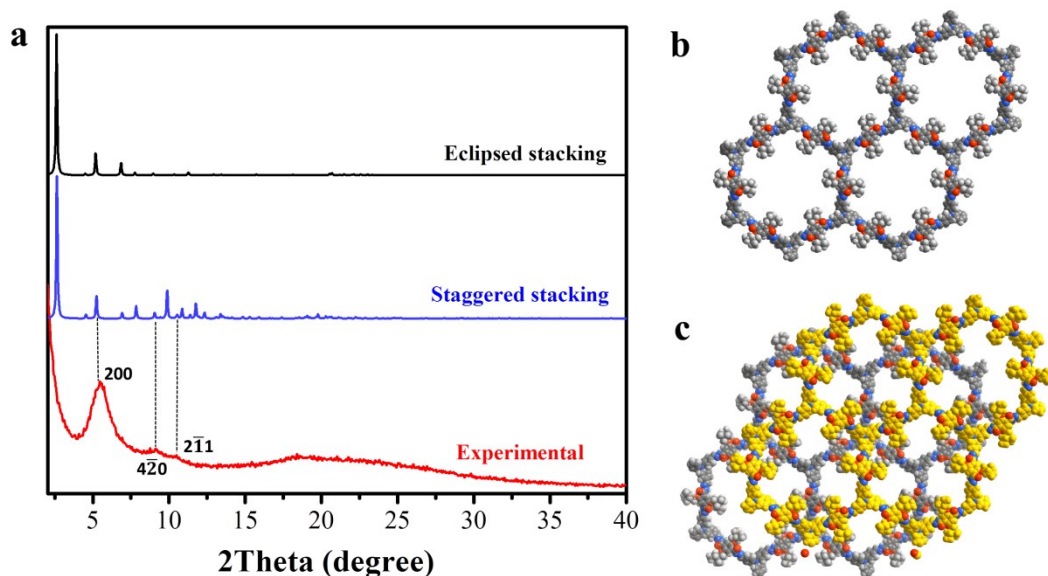

**Figure S1.** (a) Experimental (red), simulated staggered stacking (blue), and simulated eclipsed stacking (black) PXRD patterns of Tfpa-Mth COF. (b) Eclipsed packing structure of Tfpa-Mth COF. (c) Staggered packing structure of Tfpa-Mth COF.

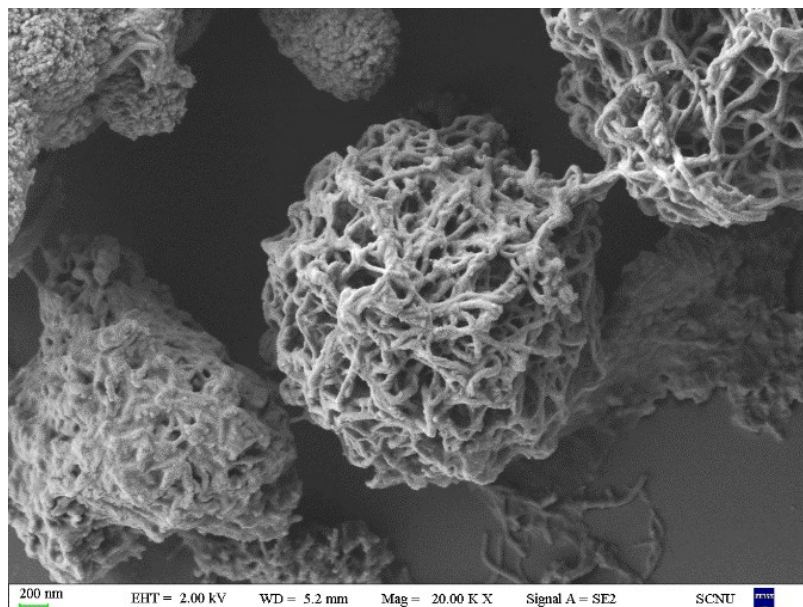

**Figure S2.** SEM image of Tfpa-Mth COF.

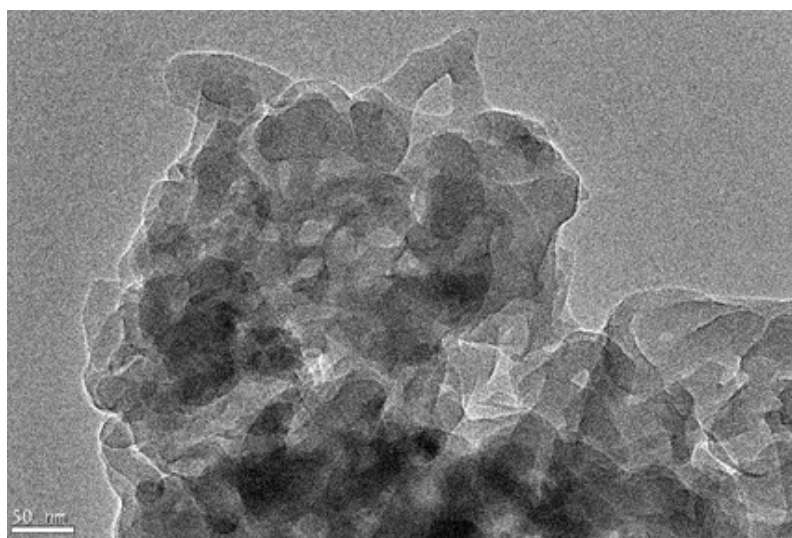

**Figure S3.** TEM image of Tfpa-Mth COF.

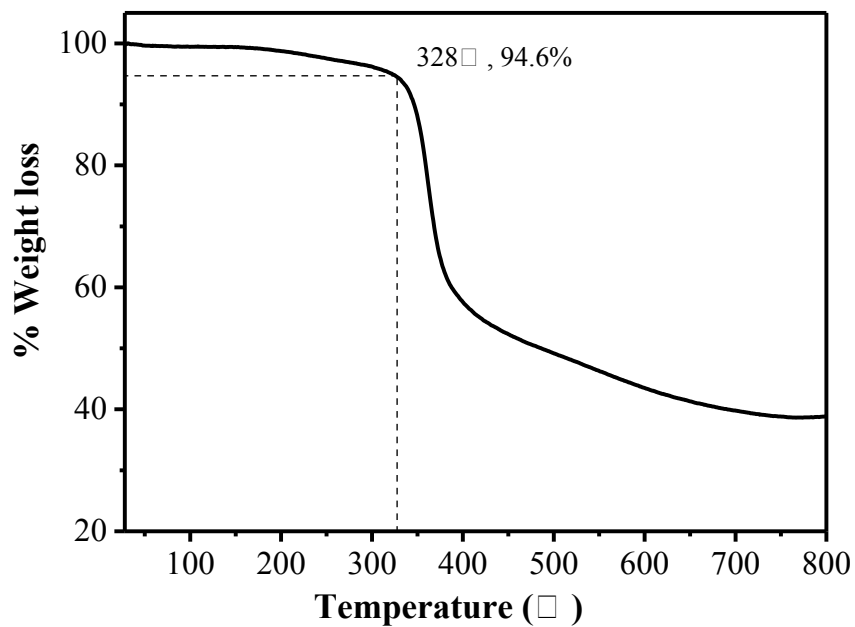

Figure S4. TGA curve of Tfpa-Mth COF.

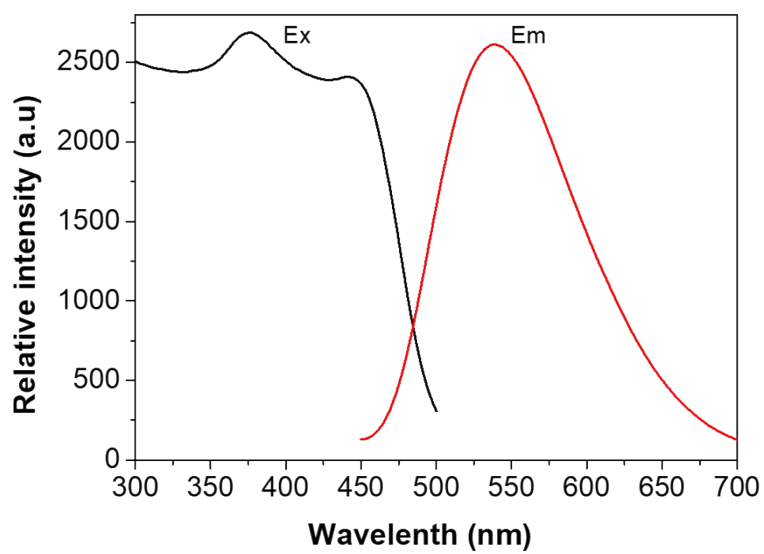

Figure S5. Excitation ( $\lambda_{em} = 539$  nm) and emission ( $\lambda_{ex} = 375$  nm) spectra of Tfpa-Mth COF in

ethanol medium at room temperature.

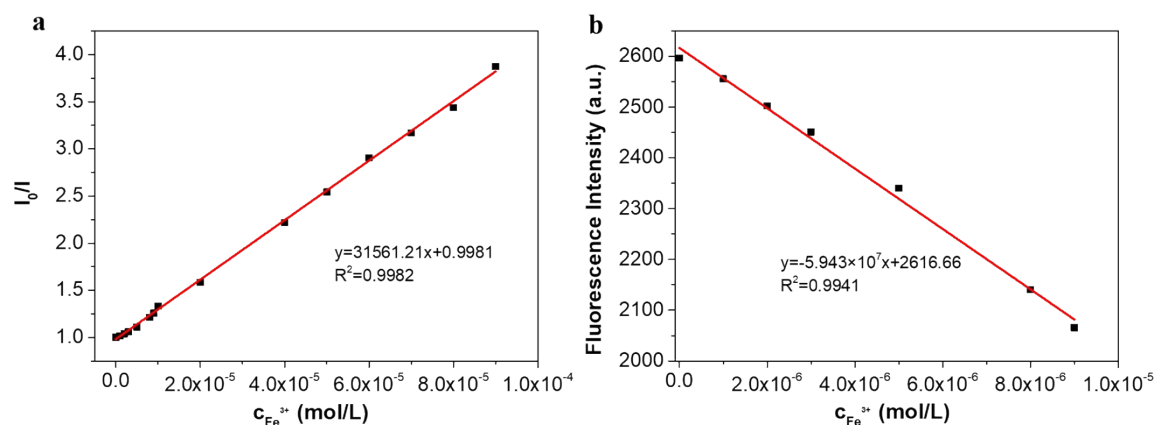

**Figure S6.** Stern–Volmer plot of photoluminescent quenching efficiency ( $I_0/I$ ) versus  $Fe^{3+}$  concentration in the Tfpa-Mth COF suspension (b) Linear relationship between Tfpa-Mth COF fluorescence intensity and  $Fe^{3+}$  concentration.

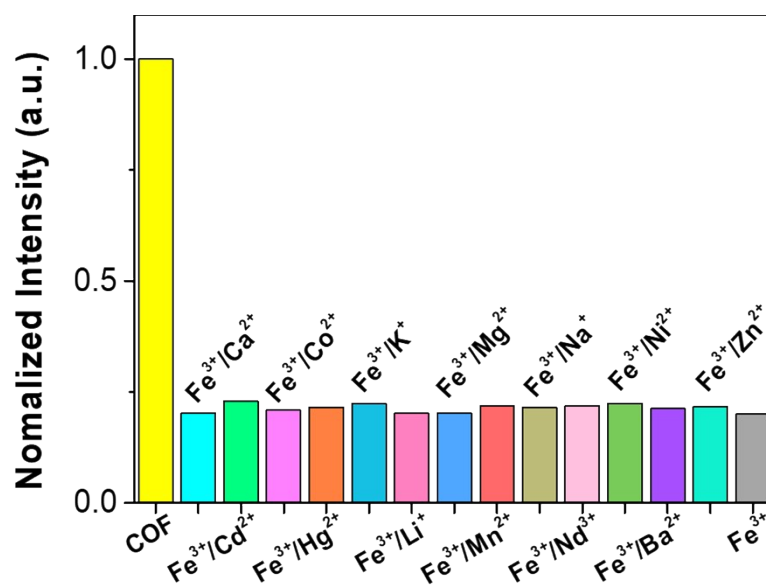

**Figure S7.** Fluorescence intensity changes of Tfpa-Mth COF at 539 nm in the presence of  $Fe^{3+}$  and other metal ions. The concentrations of all the metal ions were  $1 \times 10^{-4}$  M.

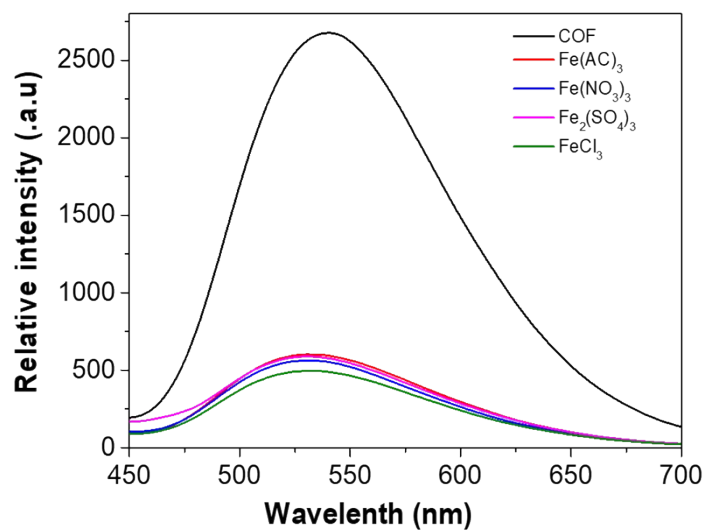

**Figure S8.** Fluorescence emission spectra of Tfpa-Mth COF suspension in various  $\text{Fe}^{3+}$  salt ethanol solutions ( $1 \times 10^{-4}$  M).

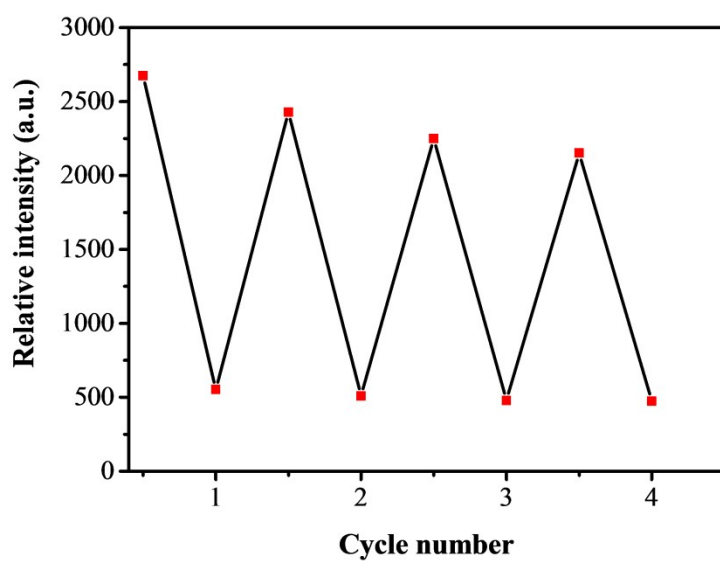

**Figure S9.** The reusability of Tfpa-Mth COF for the detection of  $\text{Fe}^{3+}$  ion.

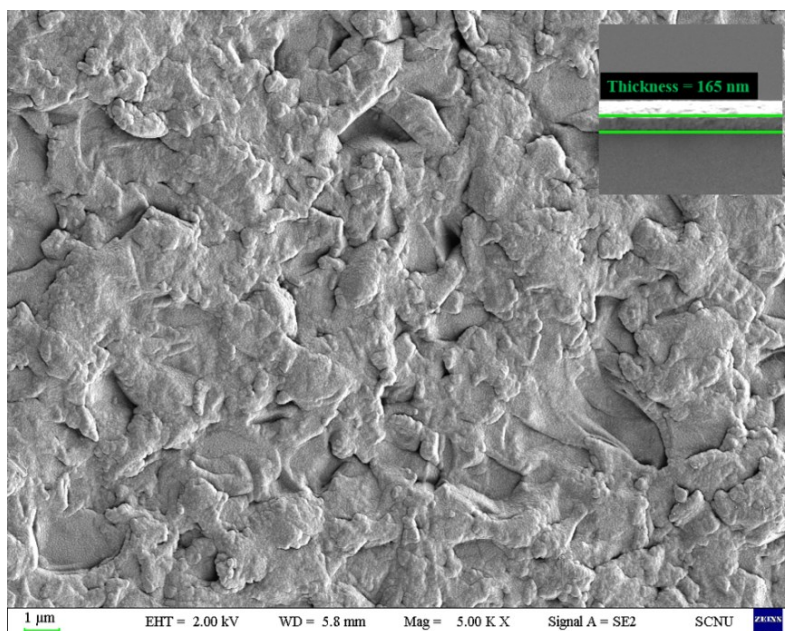

**Figure S10.** SEM image of the blank QCM chip. Inset: Cross-sectional view of the blank QCM chip.

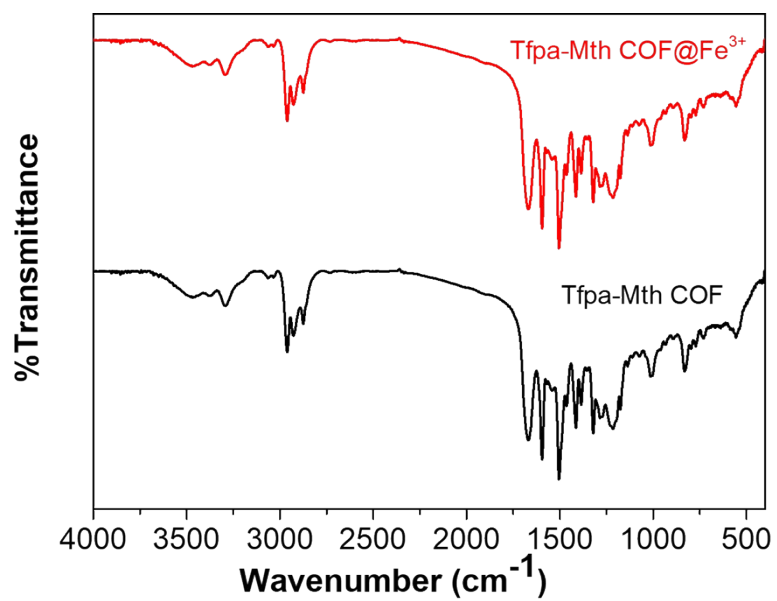

**Figure S11.** FT-IR spectra of Tfpa-Mth COF and Tfpa-Mth COF@Fe<sup>3+</sup>.

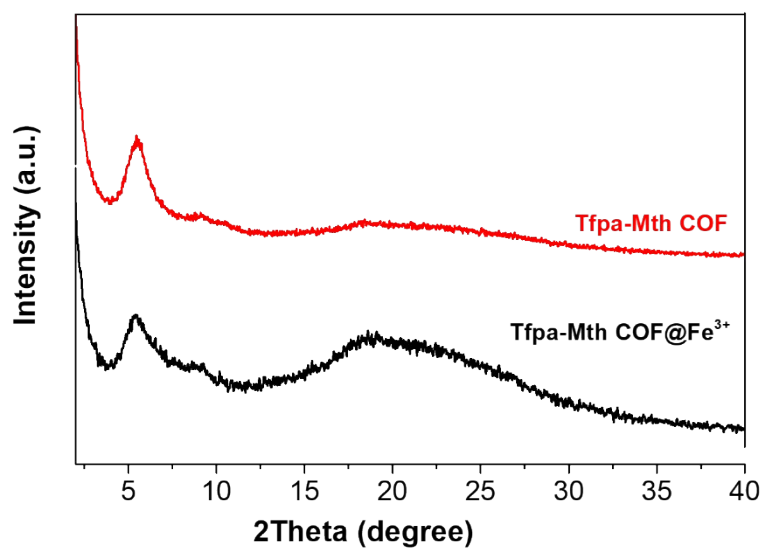

**Figure S12.** PXRD patterns of Tfpa-Mth COF and Tfpa-Mth COF@Fe<sup>3+</sup>.

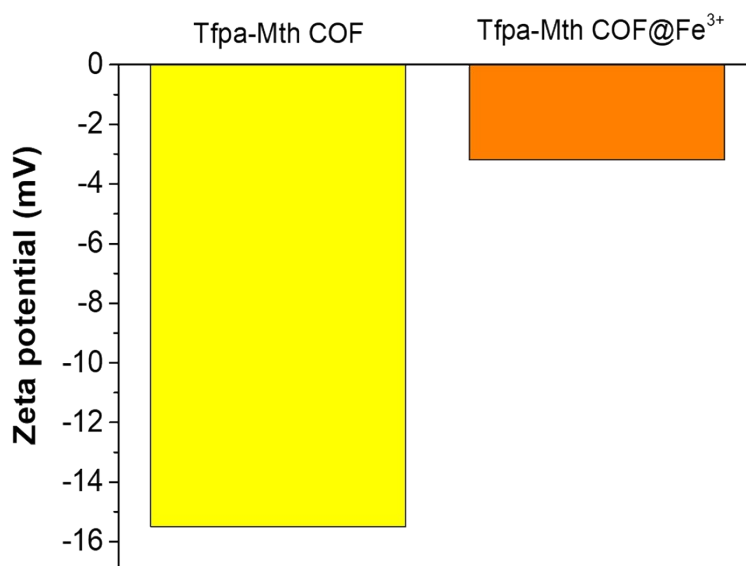

**Figure S13.** Zeta potential of Tfpa-Mth COF and Tfpa-Mth COF@Fe<sup>3+</sup>.

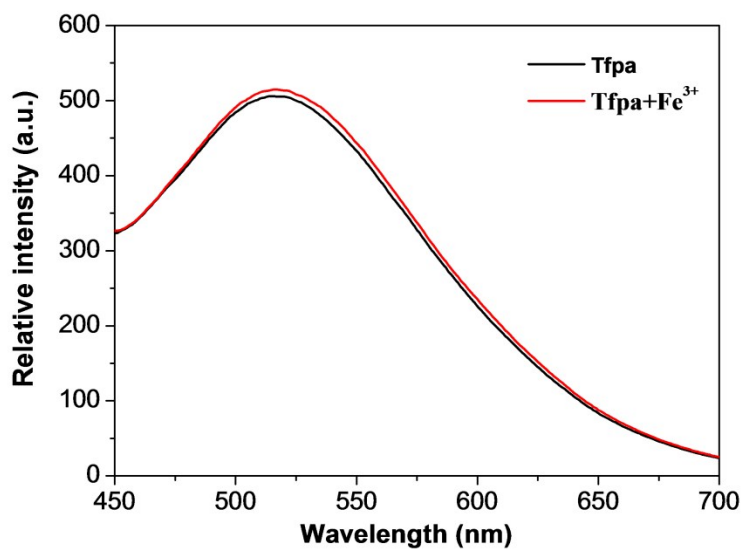

**Figure S14.** Fluorescence emission spectra of Tfpa before and after addition of  $\text{Fe}^{3+}$  ion in ethanol medium ( $\lambda_{\text{ex}}=370$ ).

**Table S1.** Fractional atomic coordinates for the unit cell of Tfpa-Mth COF with eclipsed packing.

| Tfpa-Mth COF with eclipsed packing                                          |          |          |          |
|-----------------------------------------------------------------------------|----------|----------|----------|
| Space group: $P6$                                                           |          |          |          |
| $a = 39.63 \text{ \AA}$ , $b = 39.63 \text{ \AA}$ , $c = 4.435 \text{ \AA}$ |          |          |          |
| $\alpha = \beta = 90^\circ$ , $\gamma = 120^\circ$                          |          |          |          |
| Atom                                                                        | $x/a$    | $y/b$    | $z/c$    |
| C1                                                                          | 1.587610 | 1.595640 | 0.690910 |
| C2                                                                          | 1.607200 | 1.639920 | 0.638500 |
| C3                                                                          | 1.579570 | 1.650300 | 0.467510 |
| C4                                                                          | 1.646350 | 1.654140 | 0.477340 |
| C5                                                                          | 1.597020 | 1.693980 | 0.412220 |
| H6                                                                          | 1.693980 | 1.403190 | 1.608810 |
| H7                                                                          | 1.666750 | 1.446460 | 1.591880 |
| C8                                                                          | 1.525950 | 1.540730 | 0.851060 |
| C9                                                                          | 1.540110 | 1.514450 | 0.860270 |
| C10                                                                         | 1.530630 | 1.447490 | 0.886330 |



|     |          |          |          |
|-----|----------|----------|----------|
| C11 | 1.514540 | 1.474050 | 0.866700 |
| O12 | 1.516740 | 1.418120 | 0.731610 |
| N13 | 1.560700 | 1.455450 | 1.078570 |
| N14 | 1.575470 | 1.429880 | 1.099810 |
| C15 | 1.603730 | 1.436380 | 1.281440 |
| O16 | 1.550950 | 1.581460 | 0.840280 |
| H17 | 1.607240 | 1.589800 | 0.832810 |
| H18 | 1.583140 | 1.580760 | 0.469190 |
| H19 | 1.613680 | 1.654710 | 0.860010 |
| H20 | 1.552860 | 1.640700 | 0.604550 |
| H21 | 1.570330 | 1.634460 | 0.250480 |
| H22 | 1.642030 | 1.640190 | 0.253280 |
| H23 | 1.665170 | 1.646580 | 0.613540 |
| H24 | 1.662320 | 1.686270 | 0.451000 |
| H25 | 1.620530 | 1.704570 | 0.240890 |
| H26 | 1.608690 | 1.710490 | 0.625430 |
| H27 | 1.574010 | 1.699620 | 0.325390 |
| C28 | 1.650030 | 1.358730 | 1.323530 |
| C29 | 1.600880 | 1.373620 | 1.141560 |
| C30 | 1.616170 | 1.348660 | 1.155990 |
| C31 | 1.667800 | 1.394330 | 1.480490 |
| C32 | 1.652330 | 1.419190 | 1.469050 |
| C33 | 1.618960 | 1.409230 | 1.297410 |
| N34 | 1.666670 | 1.333330 | 1.329470 |
| H35 | 1.571100 | 1.525140 | 0.862340 |
| H36 | 1.571950 | 1.480070 | 1.217360 |
| H37 | 1.616820 | 1.462360 | 1.420630 |
| H38 | 1.574980 | 1.365040 | 1.007700 |
| H39 | 1.601550 | 1.321490 | 1.035010 |

**Table S2.** Fractional atomic coordinates for the unit cell of Tfpa-Mth COF with staggered packing.

| Tfpa-Mth COF with staggered packing                                         |          |          |          |
|-----------------------------------------------------------------------------|----------|----------|----------|
| Space group: <i>P63</i>                                                     |          |          |          |
| $a = 39.29 \text{ \AA}$ , $b = 39.29 \text{ \AA}$ , $c = 9.318 \text{ \AA}$ |          |          |          |
| $\alpha = \beta = 90^\circ$ , $\gamma = 120^\circ$                          |          |          |          |
| Atom                                                                        | $x/a$    | $y/b$    | $z/c$    |
| C1                                                                          | 1.914110 | 1.241840 | 0.391790 |
| C2                                                                          | 1.936190 | 1.286000 | 0.355420 |
| C3                                                                          | 1.924020 | 1.292920 | 0.205040 |
| C4                                                                          | 1.980810 | 1.302200 | 0.365060 |
| C5                                                                          | 1.941180 | 1.336520 | 0.169280 |

|     |          |          |          |
|-----|----------|----------|----------|
| C6  | 1.793040 | 1.104280 | 0.429790 |
| C7  | 1.779900 | 1.130810 | 0.394670 |
| C8  | 1.790950 | 1.198570 | 0.355620 |
| C9  | 1.806230 | 1.171540 | 0.386770 |
| O10 | 1.809490 | 1.226810 | 0.276850 |
| N11 | 1.756700 | 1.192590 | 0.416960 |
| N12 | 1.743670 | 1.219680 | 0.395480 |
| C13 | 1.712500 | 1.215770 | 0.459050 |
| O14 | 1.767460 | 1.063190 | 0.440620 |
| H15 | 1.923920 | 1.237530 | 0.498840 |
| H16 | 1.921100 | 1.225810 | 0.308820 |
| H17 | 1.928020 | 1.301390 | 0.437030 |
| H18 | 1.891450 | 1.278910 | 0.199770 |
| H19 | 1.933120 | 1.278880 | 0.121430 |
| H20 | 1.990690 | 1.289310 | 0.279730 |
| H21 | 1.988600 | 1.295070 | 0.470980 |
| H22 | 1.997160 | 1.334730 | 0.354720 |
| H23 | 1.973510 | 1.351100 | 0.153940 |
| H24 | 1.934400 | 1.351650 | 0.255940 |
| H25 | 1.928030 | 1.339380 | 0.067660 |
| C26 | 1.677250 | 1.302960 | 0.422010 |
| C27 | 1.720240 | 1.277900 | 0.349610 |
| C28 | 1.708840 | 1.306370 | 0.339800 |
| C29 | 1.656900 | 1.270200 | 0.512530 |
| C30 | 1.668180 | 1.241680 | 0.521950 |
| C31 | 1.700130 | 1.245420 | 0.441730 |
| H32 | 1.749160 | 1.120130 | 0.372580 |
| H33 | 1.741290 | 1.168940 | 0.487240 |
| H34 | 1.695820 | 1.190990 | 0.530170 |
| H35 | 1.744950 | 1.281510 | 0.286120 |
| H36 | 1.724790 | 1.331260 | 0.268770 |
| H37 | 1.632740 | 1.267110 | 0.578140 |
| H38 | 1.652310 | 1.216960 | 0.593890 |
| C39 | 1.728740 | 1.046430 | 0.381310 |
| C40 | 1.707700 | 1.001230 | 0.390700 |
| C41 | 1.730330 | 0.985060 | 0.304740 |
| C42 | 1.665080 | 0.983610 | 0.337480 |
| C43 | 1.714190 | 0.941020 | 0.328320 |
| C44 | 1.846780 | 1.186350 | 0.409220 |
| C45 | 1.859730 | 1.159920 | 0.447750 |
| C46 | 1.848370 | 1.092850 | 0.501270 |
| C47 | 1.833250 | 1.119380 | 0.460220 |
| O48 | 1.835300 | 1.060910 | 0.442590 |

|     |          |          |          |
|-----|----------|----------|----------|
| N49 | 1.877110 | 1.103980 | 0.603200 |
| N50 | 1.893600 | 1.080180 | 0.632430 |
| C51 | 1.922130 | 1.090530 | 0.723340 |
| O52 | 1.872610 | 1.227330 | 0.395490 |
| H53 | 1.711510 | 1.056830 | 0.443720 |
| H54 | 1.730430 | 1.055360 | 0.266920 |
| H55 | 1.706950 | 0.993250 | 0.505620 |
| H56 | 1.761680 | 1.000550 | 0.338680 |
| H57 | 1.729650 | 0.990770 | 0.188290 |
| H58 | 1.664420 | 0.989030 | 0.220770 |
| H59 | 1.649960 | 0.996990 | 0.395770 |
| H60 | 1.648120 | 0.951450 | 0.357740 |
| H61 | 1.684580 | 0.923440 | 0.279460 |
| H62 | 1.712550 | 0.934300 | 0.444760 |
| H63 | 1.734060 | 0.932180 | 0.276350 |
| C64 | 1.978800 | 1.021540 | 0.770190 |
| C65 | 1.924320 | 1.028590 | 0.680530 |
| C66 | 1.943540 | 1.006900 | 0.692100 |
| C67 | 1.993850 | 1.058270 | 0.838470 |
| C68 | 1.974880 | 1.080250 | 0.825430 |
| C69 | 1.940250 | 1.065820 | 0.744760 |
| H70 | 1.890590 | 1.170520 | 0.467150 |
| H71 | 1.887140 | 1.130480 | 0.658670 |
| H72 | 1.934070 | 1.118440 | 0.779210 |
| H73 | 1.897440 | 1.016570 | 0.618530 |
| H74 | 1.931240 | 0.979000 | 0.636630 |
| H75 | 2.020960 | 1.070420 | 0.898890 |
| H76 | 1.987740 | 1.108950 | 0.875560 |
| N77 | 1.666670 | 1.333340 | 0.417050 |
| N78 | 2.000000 | 1.000000 | 0.775220 |
